# Supplementary material for: Iceberg or cut off – how adults who stutter articulate fluent-sounding utterances
Source: bioRxiv or medRxiv preprint supplement (doi:10.1101/2020.04.15.042432), 2020-04-17
Supplement: Supplementary file [file media-1.pdf]

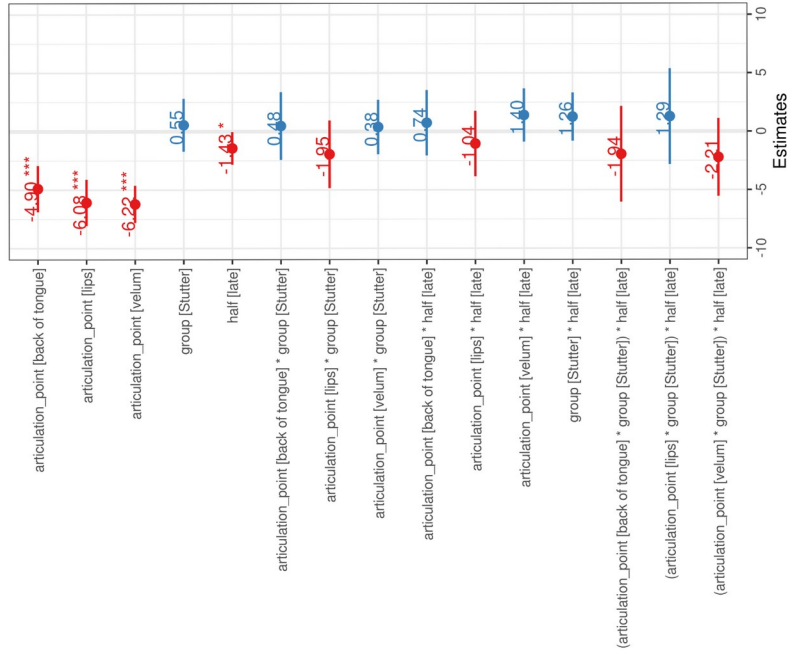

| term                                                                  | estimate | ci             | p.value     |
|-----------------------------------------------------------------------|----------|----------------|-------------|
| articulation_point [back of tongue]                                   | -4.90    | [-6.88; -2.92] | < 0.001 *** |
| articulation_point [lips]                                             | -6.08    | [-8.06; -4.10] | < 0.001 *** |
| articulation_point [velum]                                            | -6.22    | [-7.81; -4.62] | < 0.001 *** |
| group [Stutter]                                                       | 0.55     | [-1.71; 2.81]  | 0.633       |
| half [late]                                                           | -1.43    | [-2.83; -0.03] | 0.045 *     |
| articulation_point [back of tongue] * group [Stutter]                 | 0.48     | [-2.42; 3.38]  | 0.748       |
| articulation_point [lips] * group [Stutter]                           | -1.95    | [-4.85; 0.95]  | 0.189       |
| articulation_point [velum] * group [Stutter]                          | 0.38     | [-1.95; 2.72]  | 0.747       |
| articulation_point [back of tongue] * half [late]                     | 0.74     | [-2.06; 3.54]  | 0.603       |
| articulation_point [lips] * half [late]                               | -1.04    | [-3.84; 1.76]  | 0.465       |
| articulation_point [velum] * half [late]                              | 1.40     | [-0.88; 3.68]  | 0.229       |
| group [Stutter] * half [late]                                         | 1.26     | [-0.81; 3.33]  | 0.233       |
| (articulation_point [back of tongue] * group [Stutter]) * half [late] | -1.94    | [-6.04; 2.16]  | 0.355       |
| (articulation_point [lips] * group [Stutter]) * half [late]           | 1.29     | [-2.81; 5.39]  | 0.539       |
| (articulation_point [velum] * group [Stutter]) * half [late]          | -2.21    | [-5.54; 1.12]  | 0.194       |

Supplementary table 1

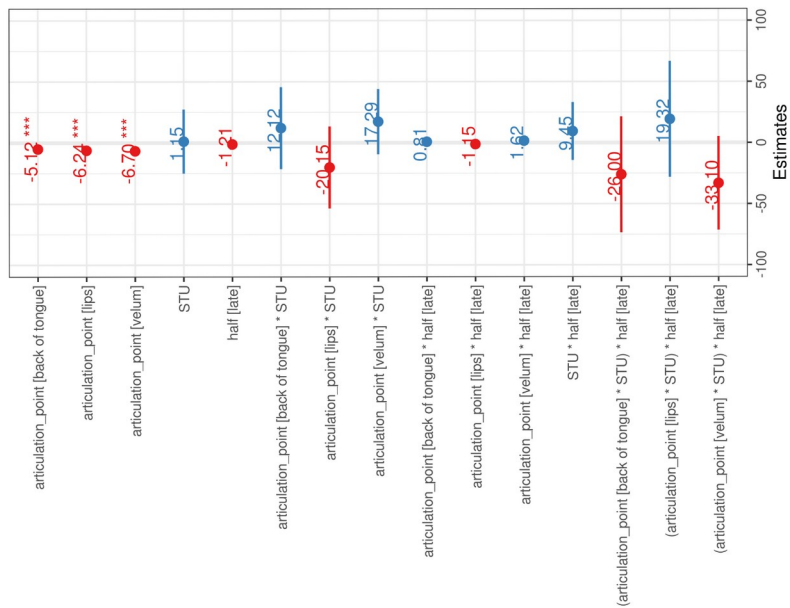

Supplementary table 2

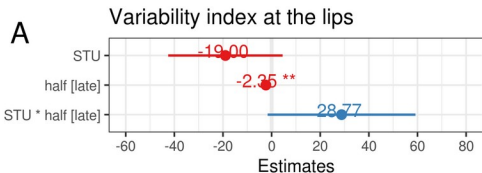

| term              | estimate | ci            | p.value  |
|-------------------|----------|---------------|----------|
| STU               | -19.0    | [-42.5; 4.54] | 0.114    |
| half [late]       | -2.4     | [-4.1; -0.63] | 0.008 ** |
| STU * half [late] | 28.8     | [-1.6; 59.17] | 0.064    |

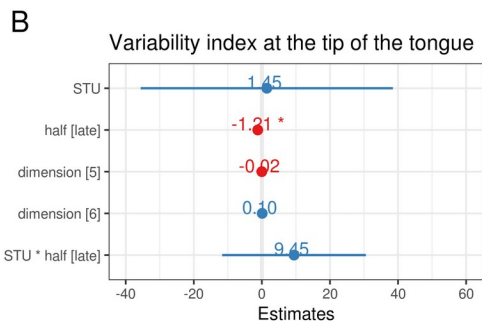

| term              | estimate | ci            | p.value |
|-------------------|----------|---------------|---------|
| STU               | 1.45     | [-35.6; 38.5] | 0.939   |
| half [late]       | -1.21    | [-2.4; 0.0]   | 0.049 * |
| dimension [5]     | -0.02    | [-1.1; 1.1]   | 0.975   |
| dimension [6]     | 0.10     | [-1.0; 1.2]   | 0.868   |
| STU * half [late] | 9.45     | [-11.7; 30.6] | 0.380   |

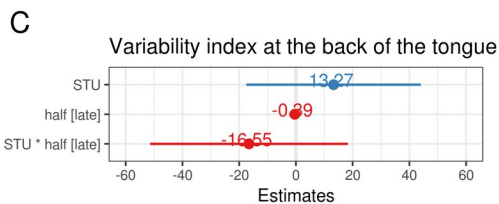

| term              | estimate | ci            | p.value |
|-------------------|----------|---------------|---------|
| STU               | 13.27    | [-17.5; 44.0] | 0.398   |
| half [late]       | -0.39    | [-2.4; 1.6]   | 0.699   |
| STU * half [late] | -16.55   | [-51.4; 18.3] | 0.352   |

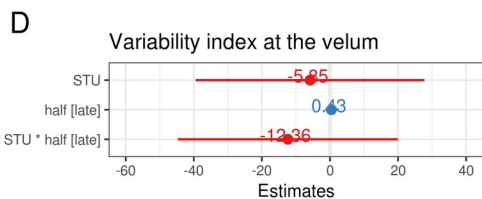

| term              | estimate | ci            | p.value |
|-------------------|----------|---------------|---------|
| STU               | -5.85    | [-39.5; 27.8] | 0.733   |
| half [late]       | 0.43     | [-1.4; 2.3]   | 0.653   |
| STU * half [late] | -12.36   | [-44.7; 20.0] | 0.454   |

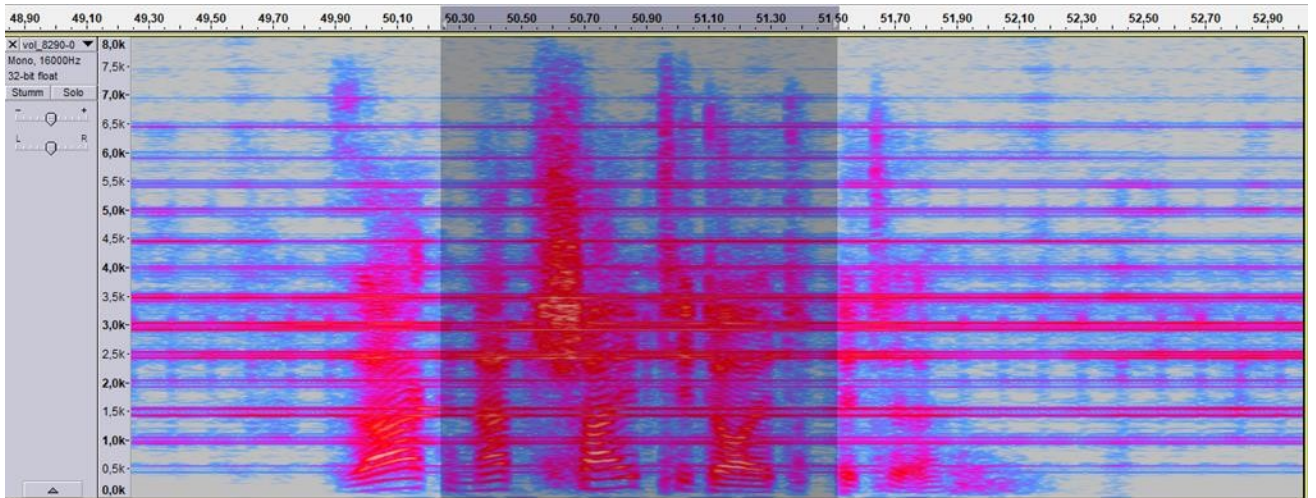

Supplementary figure 1

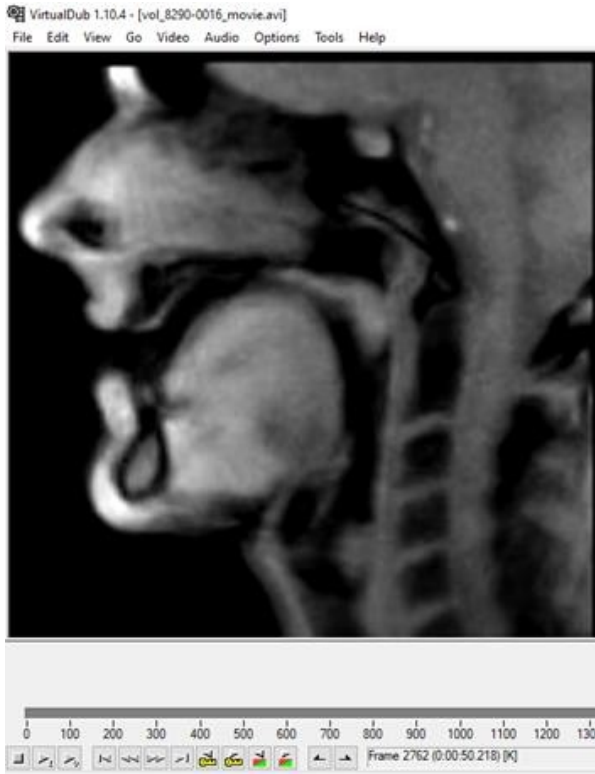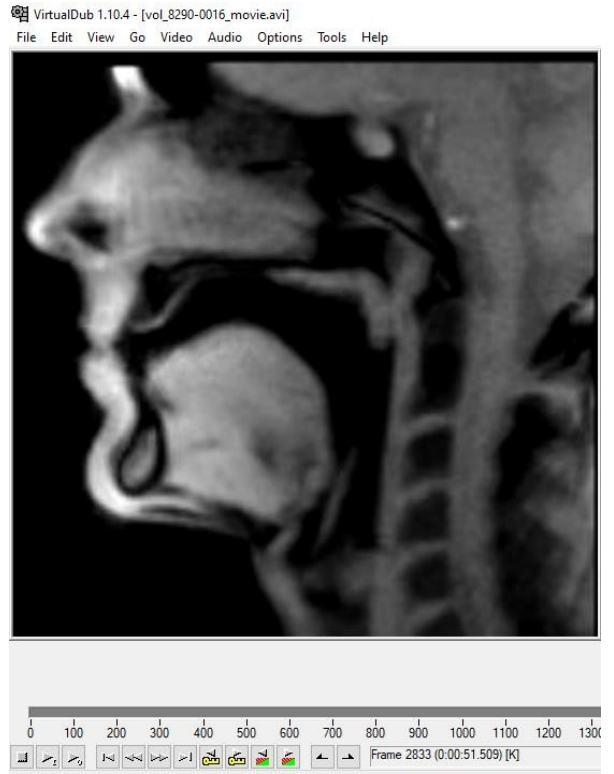

Supplementary figure 2

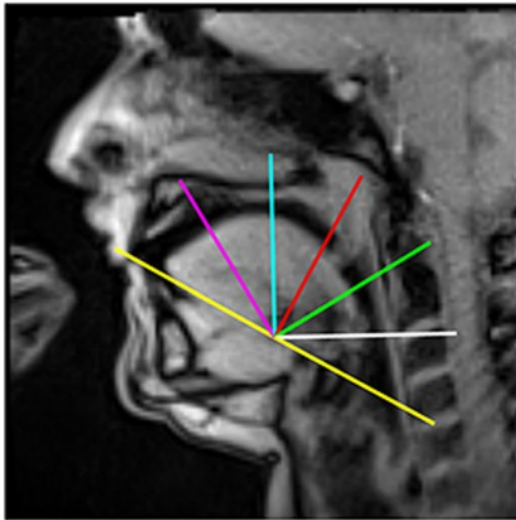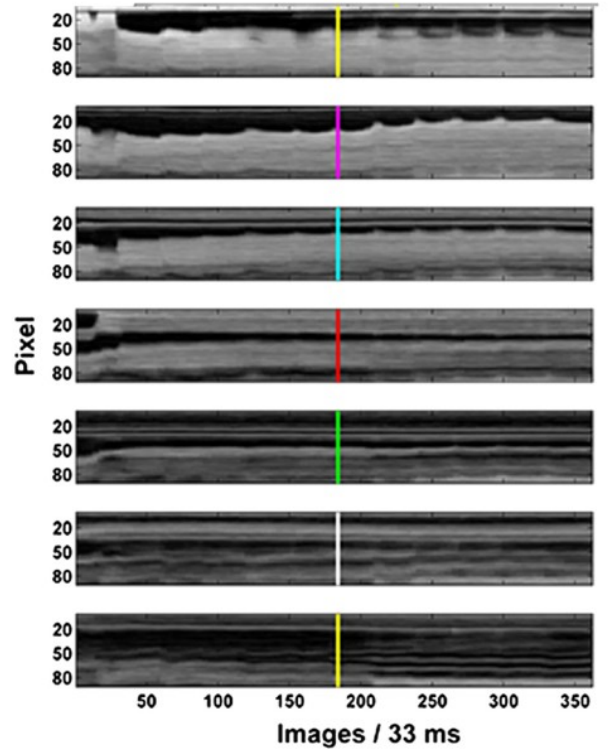

Supplementary figure 3

Supplementary figure 4

Scientific Core Facility  
Medical Biometry and  
Statistical Bioinformatics

Directory with Line Profiles  
/mnt/persistent/line\_pi

Directory for Processed Line Profiles  
/mnt/persistent/line\_pi

Line Profiles [ 2172 ]

- LineProfileF01.10.1.txt
- LineProfileF01.10.2.txt**
- LineProfileF01.10.3.txt
- LineProfileF01.10.4.txt
- LineProfileF01.10.5.txt
- LineProfileF01.10.6.txt
- LineProfileF01.10.7.txt
- LineProfileF01.11.1.txt
- LineProfileF01.11.2.txt
- LineProfileF01.11.3.txt
- LineProfileF01.11.4.txt
- LineProfileF01.11.5.txt
- LineProfileF01.11.6.txt
- LineProfileF01.11.7.txt
- LineProfileF01.12.1.txt
- LineProfileF01.12.2.txt

### GAP detection in live MRT line profiles

**Parameters**

Which gap to detect?

- first
- firstbutlast
- secondlastorlast
- secondlast
- last

Remove edge gap?

- no
- always
- ifnotlast

Use fix threshold for black pixels?

0.24

Detect

Save Processed Gap

Download PDF



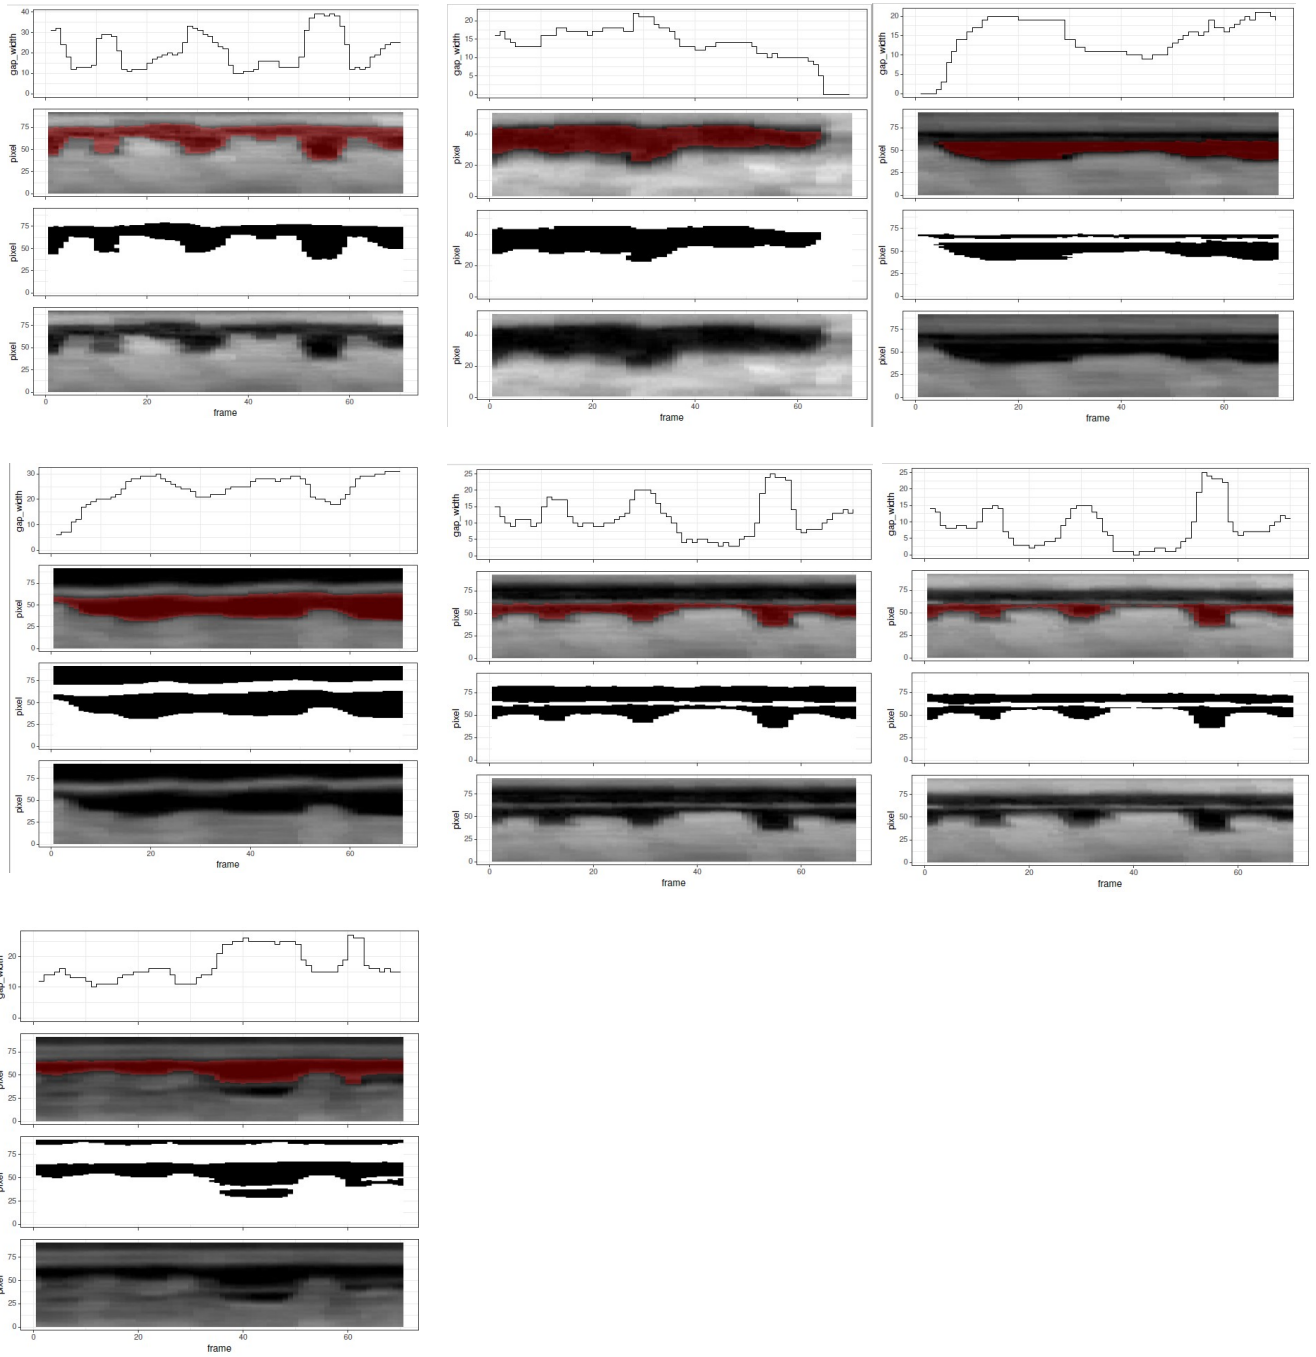

Supplementary figure 5



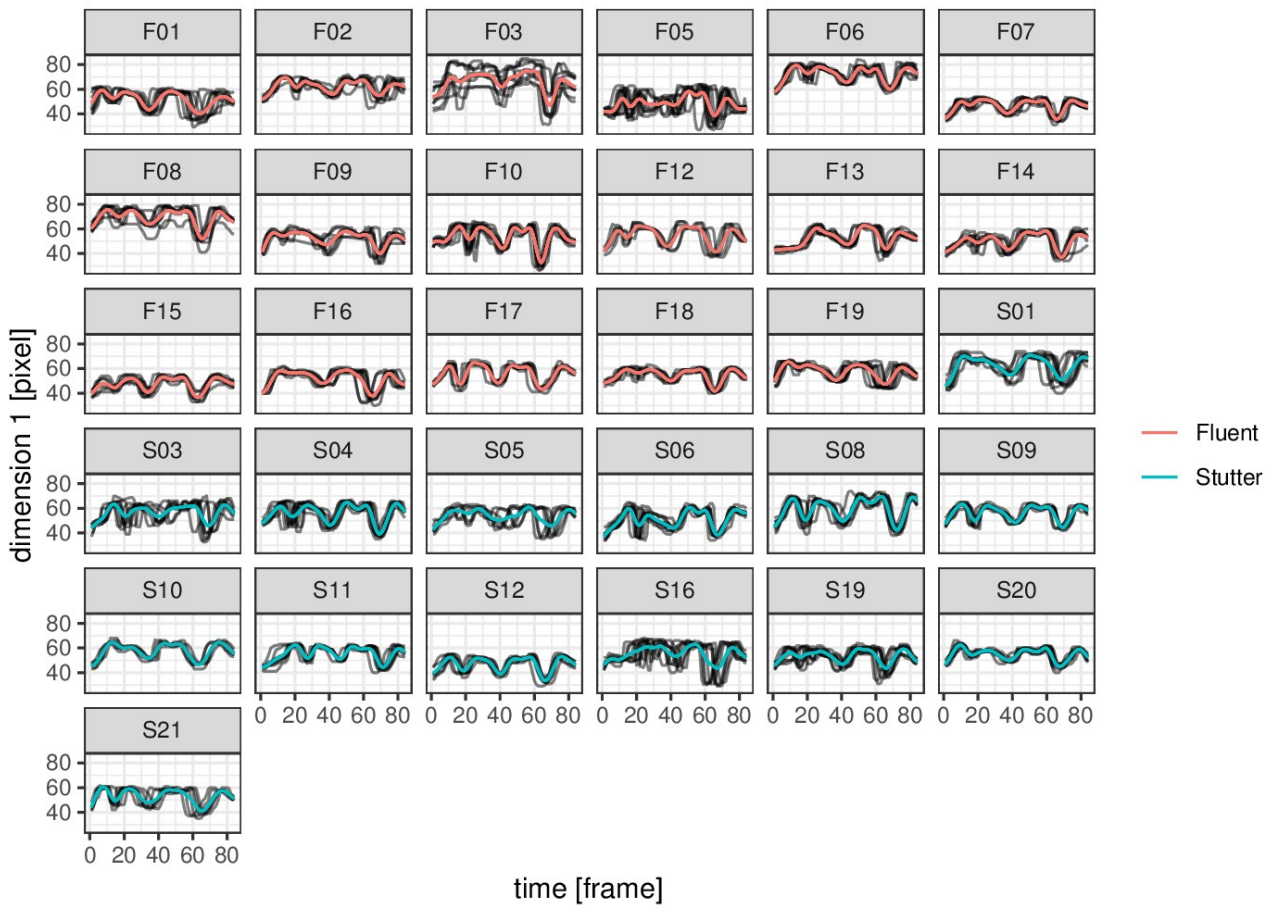

Supplementary figure 6

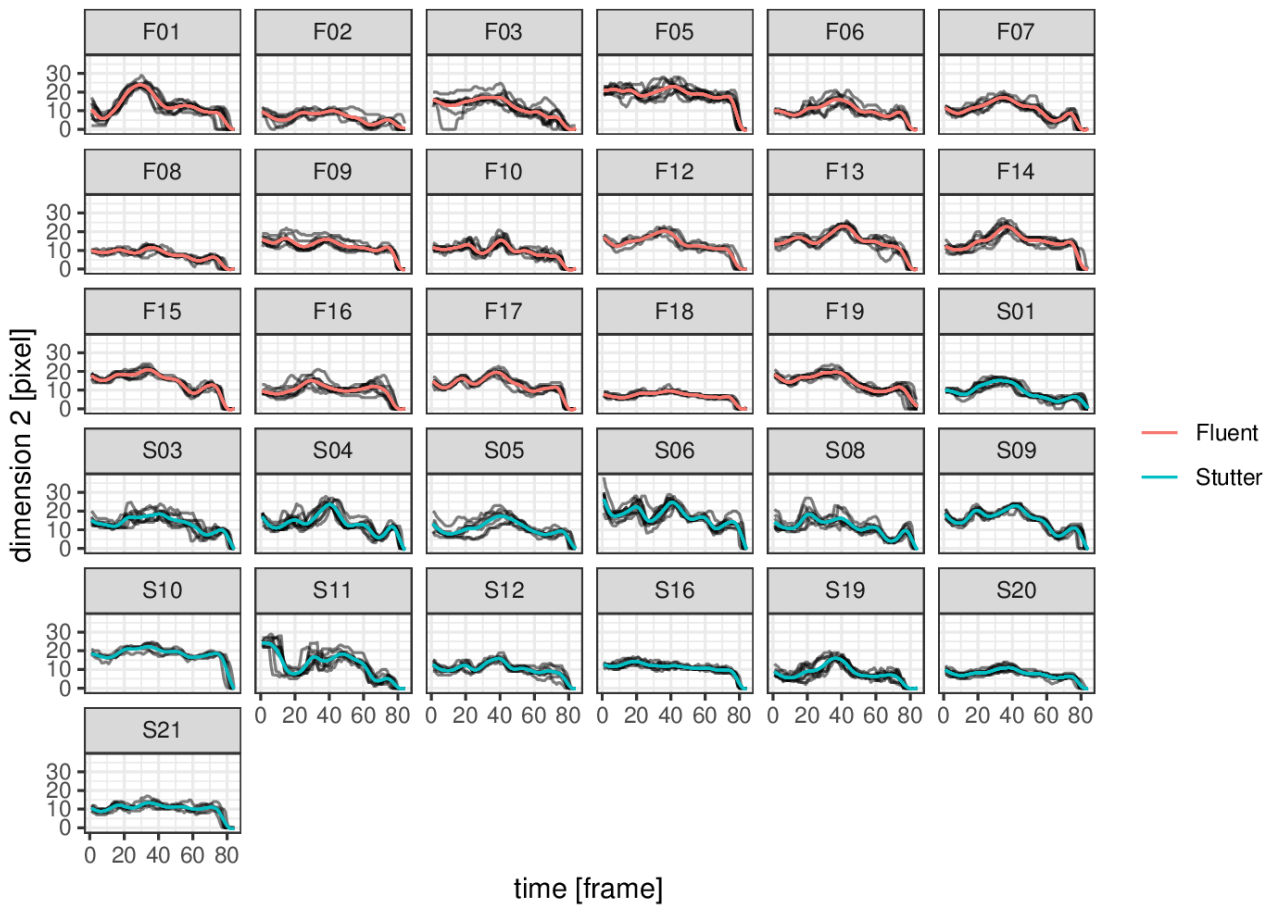

Supplementary figure 7

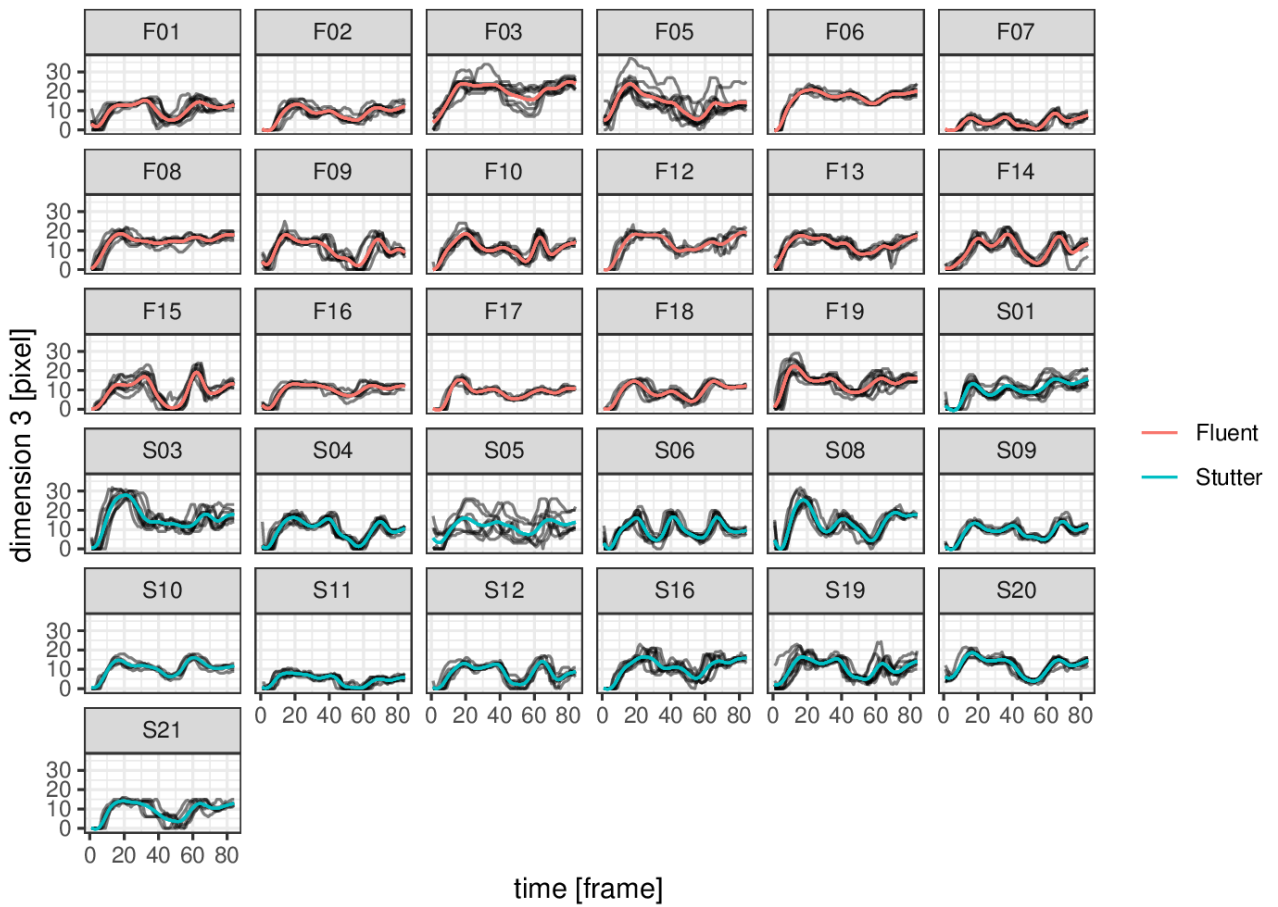

Supplementary figure 8

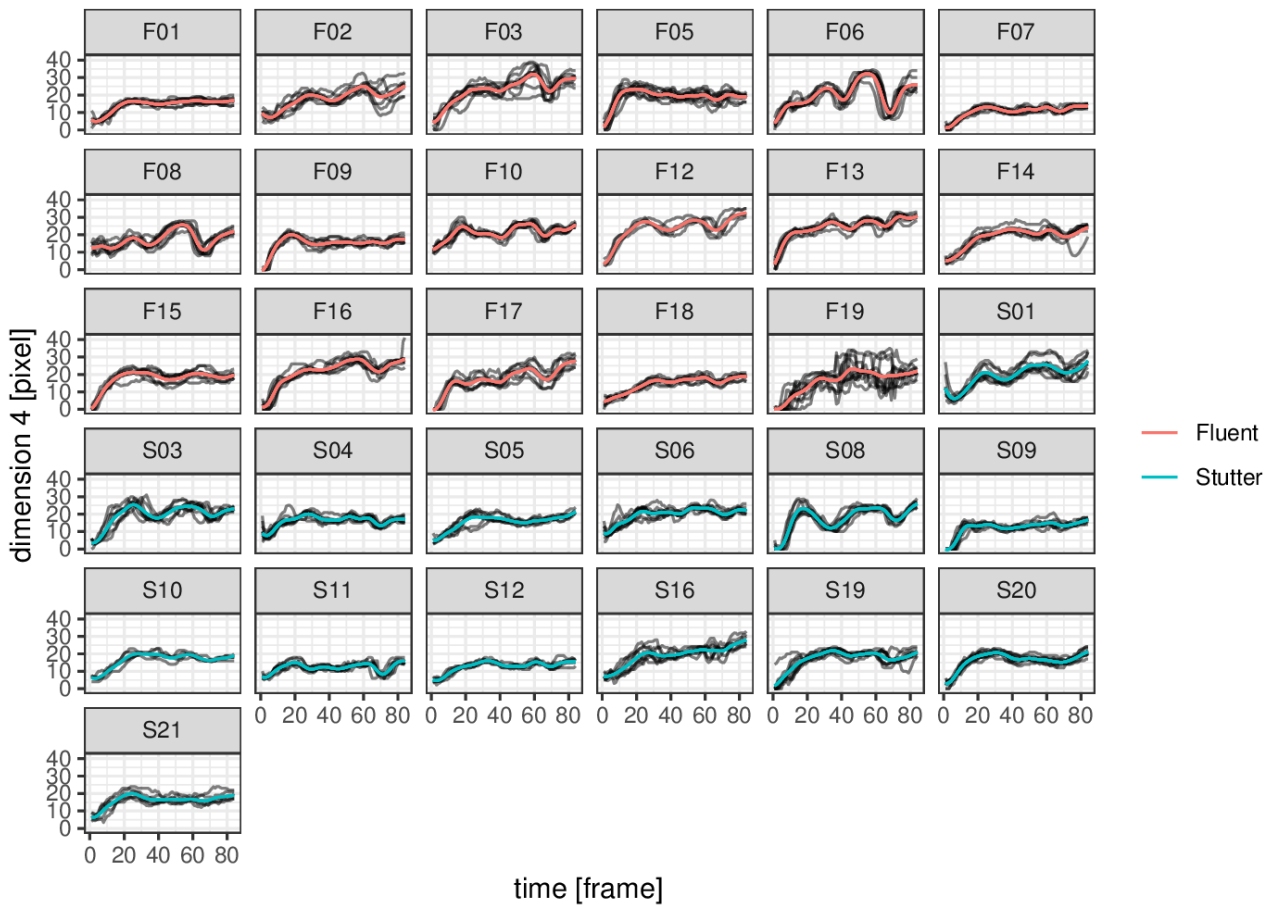

Supplementary figure 9

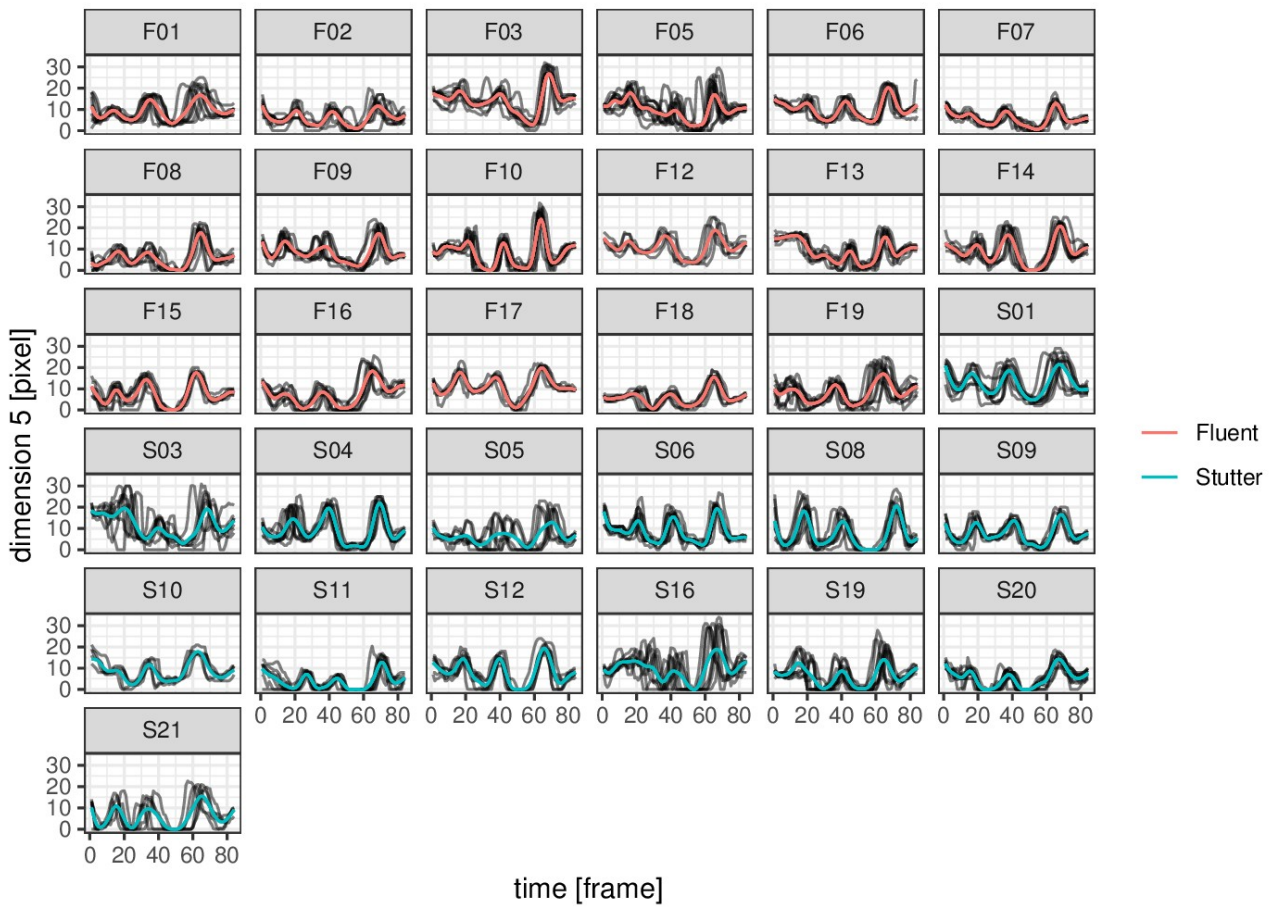

Supplementary figure 10

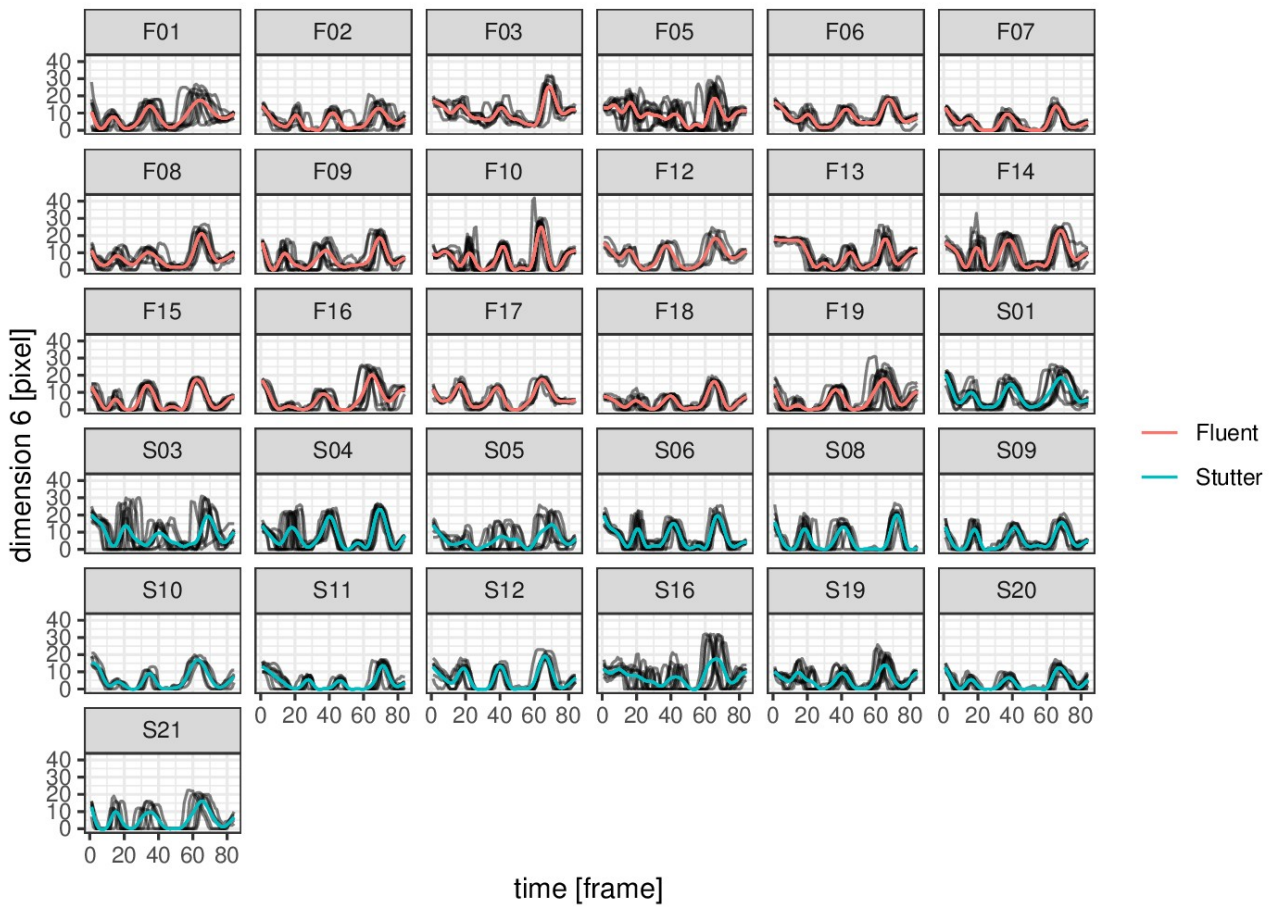

Supplementary figure 11

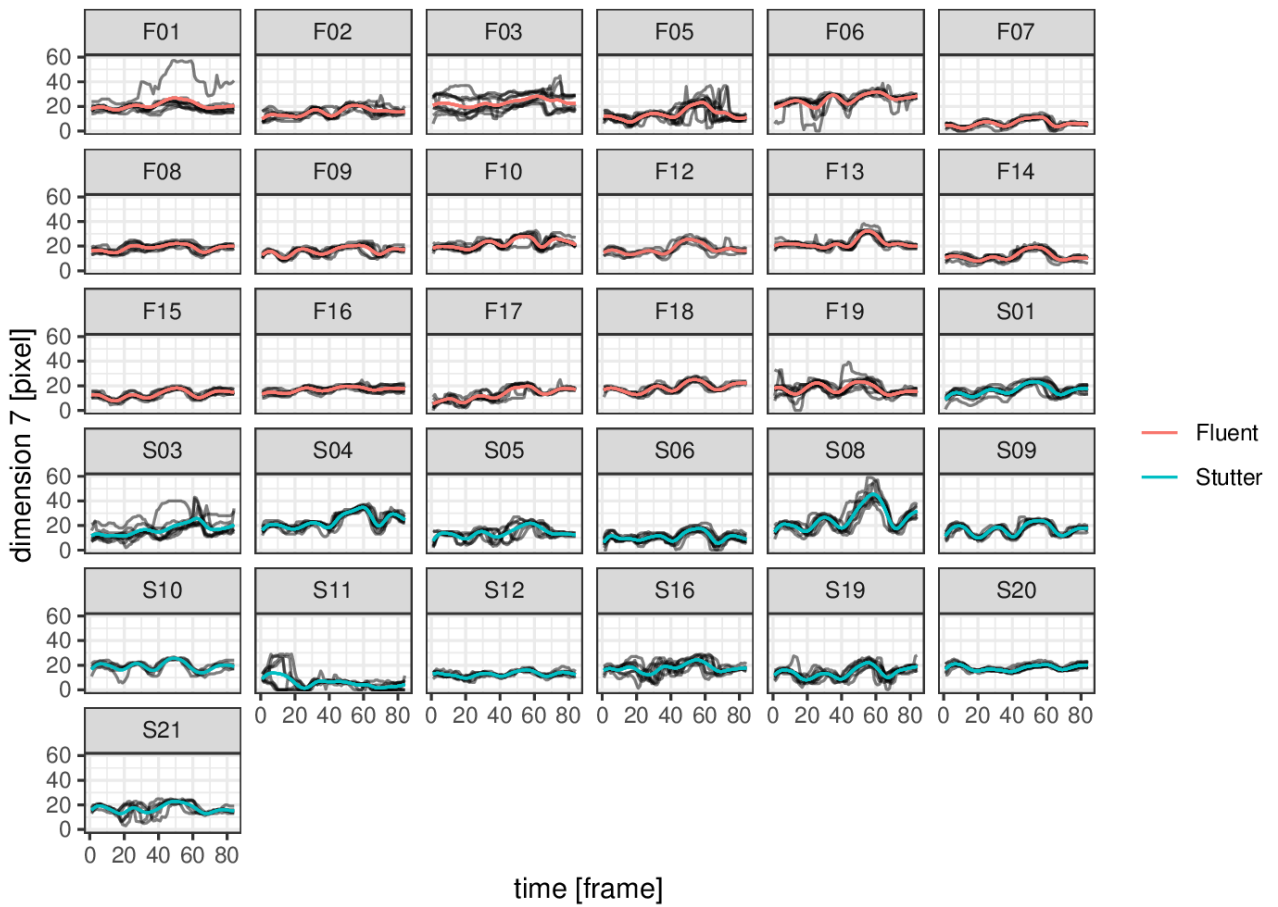

Supplementary figure 12



#### Dimension 1

##### Constant coefficients:

| term        | Estimate | Std. Error | t value | Pr(> t ) |
|-------------|----------|------------|---------|----------|
| (Intercept) | 56.0     | 0.45       | 123.0   | < 0.001  |

##### Smooth terms & functional coefficients:

| term              | edf   | Ref.df | F     | p-value |
|-------------------|-------|--------|-------|---------|
| Intercept(yindex) | 17.0  | 19.0   | 12.01 | < 0.001 |
| group(yindex)     | 1.0   | 1.0    | 0.71  | 0.399   |
| s(proband)        | 628.0 | 773.0  | 55.17 | < 0.001 |

#### Dimension 2

##### Constant coefficients:

| term        | Estimate | Std. Error | t value | Pr(> t ) |
|-------------|----------|------------|---------|----------|
| (Intercept) | 12.0     | 0.29       | 40.0    | < 0.001  |

##### Smooth terms & functional coefficients:

| term              | edf   | Ref.df | F    | p-value |
|-------------------|-------|--------|------|---------|
| Intercept(yindex) | 17.0  | 19.0   | 15.1 | < 0.001 |
| group(yindex)     | 19.0  | 20.0   | 3.8  | < 0.001 |
| s(proband)        | 534.0 | 773.0  | 80.8 | < 0.001 |

#### Dimension 3

##### Constant coefficients:

| term        | Estimate | Std. Error | t value | Pr(> t ) |
|-------------|----------|------------|---------|----------|
| (Intercept) | 11.0     | 0.29       | 38.0    | < 0.001  |

##### Smooth terms & functional coefficients:

| term              | edf   | Ref.df | F     | p-value |
|-------------------|-------|--------|-------|---------|
| Intercept(yindex) | 17.3  | 19.0   | 21.65 | < 0.001 |
| group(yindex)     | 1.8   | 1.9    | 0.43  | 0.585   |
| s(proband)        | 551.8 | 773.0  | 58.84 | < 0.001 |

#### Dimension 4

##### Constant coefficients:

| term        | Estimate | Std. Error | t value | Pr(> t ) |
|-------------|----------|------------|---------|----------|
| (Intercept) | 17.0     | 0.32       | 54.0    | < 0.001  |

##### Smooth terms & functional coefficients:

| term              | edf   | Ref.df | F    | p-value |
|-------------------|-------|--------|------|---------|
| Intercept(yindex) | 17.0  | 19.0   | 17.0 | < 0.001 |
| group(yindex)     | 1.0   | 1.0    | 6.0  | 0.014   |
| s(proband)        | 506.0 | 773.0  | 63.0 | < 0.001 |

#### Dimension 5

##### Constant coefficients:

| term        | Estimate | Std. Error | t value | Pr(> t ) |
|-------------|----------|------------|---------|----------|
| (Intercept) | 8.30     | 0.23       | 37.0    | < 0.001  |

##### Smooth terms & functional coefficients:

| term              | edf   | Ref.df | F    | p-value |
|-------------------|-------|--------|------|---------|
| Intercept(yindex) | 17.2  | 19.0   | 18.3 | < 0.001 |
| group(yindex)     | 1.1   | 1.1    | 1.9  | 0.180   |
| s(proband)        | 622.5 | 773.0  | 29.6 | < 0.001 |

#### Dimension 6

##### Constant coefficients:

| term        | Estimate | Std. Error | t value | Pr(> t ) |
|-------------|----------|------------|---------|----------|
| (Intercept) | 6.50     | 0.21       | 31.0    | < 0.001  |

##### Smooth terms & functional coefficients:

| term              | edf   | Ref.df | F    | p-value |
|-------------------|-------|--------|------|---------|
| Intercept(yindex) | 17.0  | 19.0   | 23.6 | < 0.001 |
| group(yindex)     | 1.0   | 1.0    | 2.8  | 0.095   |
| s(proband)        | 644.0 | 773.0  | 22.6 | < 0.001 |

#### Dimension 7

##### Constant coefficients:

| term        | Estimate | Std. Error | t value | Pr(> t ) |
|-------------|----------|------------|---------|----------|
| (Intercept) | 17.0     | 0.44       | 39.0    | < 0.001  |

##### Smooth terms & functional coefficients:

## Supplementary table 4
